# Supplementary material for: Structural characterization of a peptoid with lysine-like side chains and biological activity using NMR and computational methods
Source: Royal Society of Chemistry journal article supplement (doi:10.1039/c2ob27039k), 2012-11-26
Supplement: c2ob27039k.pdf [file c2ob27039k.pdf]

## Supplementary Information

### Structural Characterization of a Peptoid with Lysine-like Side Chains and Biological Activity using NMR and Computational Methods

Ulrich Sternberg, Esther Birtalan, Igor Jakovkin, Burkhard Luy, Ute Schepers, Stefan Bräse, and Claudia Muhle-Goll

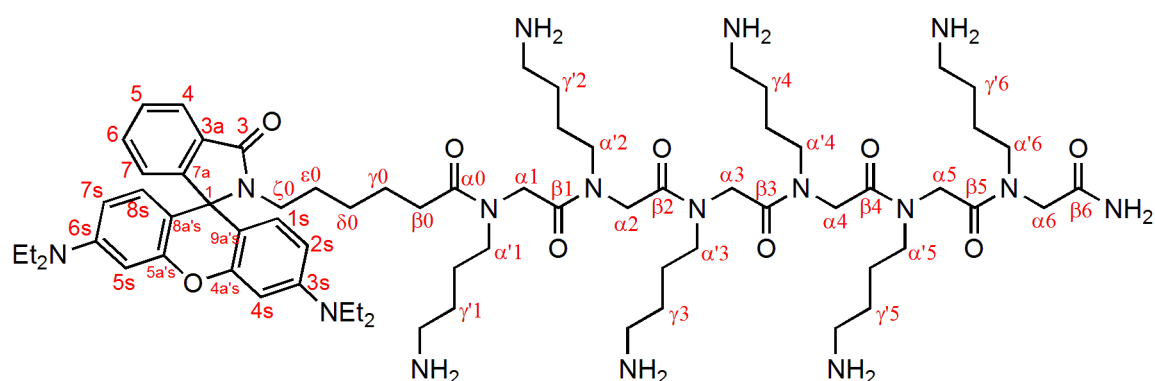

**Figure S1:** Structure of Rhodamine B-labeled oligo-N-substituted glycine [RhoBSpiro Ahx] [BUT]<sub>6</sub>NH<sub>2</sub>

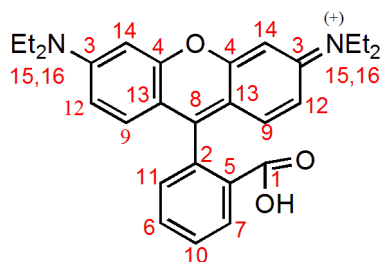

**Figure S2:** Structure of Rhodamine B. Atom labels were taken from the Spectral Database for Organic Compounds, SDBS No.: 15673 ( <http://riodb01.ibase.aist.go.jp/sdbs/> )

**Table S1:** Distances derived from NOESY spectra

| Atom1                      | Atom 2                      | Distance [Å] |
|----------------------------|-----------------------------|--------------|
| H $\alpha$ [1,2] Gly [1-6] | H $\alpha$ [1,2] Gly [1-6]  | 4.0 $\pm$ 1  |
| H $\alpha$ [1,2] Gly [1-6] | H $\alpha'$ [1,2] Lys [1-6] | 2.5 $\pm$ 1  |
| H $\alpha$ [1,2] Gly [1-6] | H $\beta'$ [1,2] Lys [1-6]  | 4.5 $\pm$ 1  |

**Table S2:** Calculated and experimental  $^{13}\text{C}$  chemical shifts for the lowest energy structure.

| Atom               | <i>cis</i> -amide conformation        |                                         | <i>trans</i> -amide conformation      |                                         |
|--------------------|---------------------------------------|-----------------------------------------|---------------------------------------|-----------------------------------------|
|                    | Calculated<br>chemical shift<br>(ppm) | Experimental<br>chemical shift<br>(ppm) | Calculated<br>chemical shift<br>(ppm) | Experimental<br>chemical shift<br>(ppm) |
| C $\alpha$ 0       | 173.7                                 | 173.0                                   | 173.2                                 | 173.0                                   |
| C $\beta$ 0        | 38.4                                  | 40.4                                    | 39.5                                  | 40.4                                    |
| C $\gamma$ 0       | 27.6                                  | 25.4                                    | 27.4                                  | 25.4                                    |
| C $\delta$ 0       | 31.2                                  | 27.6                                    | 30.2                                  | 27.6                                    |
| C $\epsilon$ 0     | 29.0                                  | 27.1                                    | 29.3                                  | 27.1                                    |
| C $\zeta$ 0        | 42.2                                  | 41.1                                    | 41.5                                  | 41.1                                    |
| C $\beta$ _GLY_1   | 172.7                                 | 173.0                                   | 172.4                                 | 171.8                                   |
| C $\beta$ _GLY_2   | 171.3                                 | 170.9                                   | 172.0                                 | 171.8                                   |
| C $\beta$ _GLY_3   | 173.1                                 | 173.0                                   | 172.9                                 | 173.0                                   |
| C $\beta$ _GLY_4   | 172.2                                 | 171.8                                   | 171.4                                 | 170.9                                   |
| C $\beta$ _GLY_5   | 172.2                                 | 171.8                                   | 173.3                                 | 173.0                                   |
| C $\beta$ _GLY_6   | not calculated <sup>1</sup>           | not assigned                            | not calculated <sup>1</sup>           | not assigned                            |
| C $\alpha$ _GLY_1  | 49.1                                  | 47.5                                    | 48.8                                  | 49.2                                    |
| C $\alpha$ _GLY_2  | 49.4                                  | 48.9                                    | 48.7                                  | 47.5                                    |
| C $\alpha$ _GLY_3  | 48.8                                  | 47.7                                    | 48.9                                  | 48.6                                    |
| C $\alpha$ _GLY_4  | 49.1                                  | 48.6                                    | 49.1                                  | 48.9                                    |
| C $\alpha$ _GLY_5  | 49.5                                  | 49.2                                    | 48.6                                  | 47.7                                    |
| C $\alpha$ _GLY_6  | 49.5                                  | 49.2                                    | 49.3                                  | 49.2                                    |
| C $\beta'$ _LYS_6  | 29.4                                  | 24.3                                    | 28.8                                  | 23.6                                    |
| C $\gamma'$ _LYS_6 | 29.4                                  | 23.6                                    | 29.5                                  | 24.3                                    |
| C $\delta'$ _LYS_6 | 39.1                                  | 39.9                                    | 38.9                                  | 39.2                                    |
| C $\alpha'$ _LYS_6 | 41.9                                  | 47.7                                    | 42.2                                  | 48.1                                    |
| C $\beta'$ _LYS_5  | 28.9                                  | 23.6                                    | 29.2                                  | 24.3                                    |
| C $\gamma'$ _LYS_5 | 29.9                                  | 24.3                                    | 29.8                                  | 23.6                                    |
| C $\delta'$ _LYS_5 | 39.3                                  | 39.9                                    | 38.7                                  | 39.2                                    |
| C $\alpha'$ _LYS_5 | 41.6                                  | 47.7                                    | 41.9                                  | 47.9                                    |
| C $\beta'$ _LYS_4  | 28.8                                  | 24.3                                    | 29.2                                  | 24.3                                    |
| C $\gamma'$ _LYS_4 | 30.1                                  | 23.6                                    | 29.7                                  | 24.3                                    |
| C $\delta'$ _LYS_4 | 39.2                                  | 39.9                                    | 39.3                                  | 39.9                                    |
| C $\alpha'$ _LYS_4 | 42.0                                  | 47.9                                    | 41.7                                  | 47.7                                    |
| C $\beta'$ _LYS_3  | 29.7                                  | 23.6                                    | 29.9                                  | 24.3                                    |
| C $\gamma'$ _LYS_3 | 29.8                                  | 24.3                                    | 29.3                                  | 23.6                                    |
| C $\delta'$ _LYS_3 | 38.1                                  | 39.2                                    | 38.8                                  | 39.9                                    |
| C $\alpha'$ _LYS_3 | 41.5                                  | 47.2                                    | 41.9                                  | 47.7                                    |
| C $\beta'$ _LYS_2  | 28.7                                  | 23.6                                    | 30.3                                  | 23.6                                    |
| C $\gamma'$ _LYS_2 | 29.9                                  | 24.3                                    | 28.8                                  | 24.3                                    |
| C $\delta'$ _LYS_2 | 38.9                                  | 39.2                                    | 38.8                                  | 39.9                                    |
| C $\alpha'$ _LYS_2 | 42.1                                  | 48.1                                    | 41.2                                  | 47.2                                    |
| C $\beta'$ _LYS_1  | 29.9                                  | 23.6                                    | 29.3                                  | 23.6                                    |
| C $\gamma'$ _LYS_1 | 28.7                                  | 24.3                                    | 29.6                                  | 23.6                                    |
| C $\delta'$ _LYS_1 | 38.7                                  | 39.2                                    | 38.1                                  | 39.2                                    |
| C $\alpha'$ _LYS_1 | 42.3                                  | 48.1                                    | 42.4                                  | 48.1                                    |
| C3_Rho             | 155.5                                 | 154.4                                   | 155.7                                 | 154.4                                   |
| C5_Rho             | 125.4                                 | 125.1                                   | 109.1                                 | 111.2                                   |

|          |                       |       |                       |       |
|----------|-----------------------|-------|-----------------------|-------|
| C4_Rho   | 130.3                 | 130.8 | 129.7                 | 130.8 |
| C3a_Rho  | 120.7                 | 123.9 | 130.3                 | 130.3 |
| C7a_Rho  | 135.9                 | 134.5 | 119.8                 | 123.9 |
| C7_Rho   | 123.0                 | 123.9 | 136.8                 | 134.5 |
| C6_Rho   | 130.1                 | 130.3 | 122.9                 | 125.1 |
| C3s_Rho  | 134.6                 | 134.5 | 124.7                 | 123.9 |
| C2s_Rho  | 127.1                 | 130.8 | 132.5                 | 132.1 |
| C1s_Rho  | 124.8                 | 123.9 | 124.4                 | 130.3 |
| C9as_Rho | 125.3                 | 123.9 | 125.8                 | 125.1 |
| C4as_Rho | 130.8                 | 130.3 | 126.7                 | 125.1 |
| C4s_Rho  | 112.0                 | 114.7 | 130.7                 | 130.3 |
| C8as_Rho | 126.5                 | 125.1 | 109.5                 | 114.7 |
| C5as_Rho | 131.4                 | 130.8 | 125.7                 | 123.9 |
| C8s_Rho  | 125.6                 | 125.1 | 131.1                 | 130.8 |
| C7s_Rho  | 127.8                 | 130.3 | 124.5                 | 123.9 |
| C6s_Rho  | 132.4                 | 132.1 | 124.5                 | 130.8 |
| C5s_Rho  | 110.3                 | 111.2 | 134.8                 | 134.5 |
| C1       | excluded <sup>2</sup> | 66.7  | excluded <sup>2</sup> | 66.7  |

<sup>1</sup>The values are not calculated because a proper parametrization for the C(sp<sup>2</sup>)-N(sp<sup>3</sup>) bond type was missing.

<sup>2</sup>Excluded because of steric strain.

The spread of the calculated chemical shifts for the backbone atoms between single structures is < 1 ppm (0.6 ppm for CA\_Gly\_2). As expected, the spread for the side chains is larger, but < 2 ppm (1.4 for C'\_Lys).

The observed large difference between calculated and measured CS values of the CAs\_Lys stems from the BPT parametrization and cannot be attributed to problems within the side chain conformation. A discussion of these effects is outside the scope of this paper.

**Table S3:** Calculated and experimental <sup>13</sup>C chemical shifts of Rhodamin B in D<sub>2</sub>O.

| Atom <sup>1</sup> | Calculated<br>chemical shift<br>(ppm) | Experimental<br>chemical shift<br>(ppm) |
|-------------------|---------------------------------------|-----------------------------------------|
| C3_A              | 157.0                                 | 157.0                                   |
| C4_A              | 155.0                                 | 155.1                                   |
| C9_A              | 120.1                                 | 130.5                                   |
| C12_A             | 116.6                                 | 113.6                                   |
| C13_A             | 113.9                                 | 112.4                                   |
| C14_A             | 97.1                                  | 95.7                                    |
| C3_B              | 156.8                                 | 157.0                                   |
| C4_B              | 154.8                                 | 155.1                                   |
| C9_B              | 123.6                                 | 130.5                                   |
| C13_B             | 113.8                                 | 112.4                                   |
| C14_B             | 96.6                                  | 95.7                                    |
| C12_B             | 117.1                                 | 113.6                                   |
| C1                | 168.8                                 | 168.6                                   |
| C2                | 156.2                                 | 157.0                                   |
| C6                | 131.8                                 | 132.4                                   |
| C7                | 129.0                                 | 130.7                                   |
| C10               | 130.4                                 | 130.1                                   |
| C11               | 129.6                                 | 129.8                                   |
| C8                | not assigned                          |                                         |
| C5                | not assigned                          |                                         |
| C15               | not calculated                        |                                         |
| C16               | not calculated                        |                                         |

<sup>1</sup>Atoms 3,4, 9,12, 13,14, which occur in both aromatic ring systems cannot be distinguished in the NMR spectra, but yield different CS values in the calculations. Thus they are named A and B, respectively.

**Table S4:** Summary of the structure investigation

|                                                               | cis-peptoid | trans-peptoid |
|---------------------------------------------------------------|-------------|---------------|
| Number of calculated models                                   | 500         | 500           |
| Number of selected models                                     | 10          | 10            |
| Number of <sup>13</sup> C CS values per model                 | 60          | 60            |
| RMS calculated CS to experiment                               | 3.36 ppm    | 3.55 ppm      |
| Quality CS for the 10 best structures <sup>1</sup>            | 0.55        | 0.5           |
| Number of assigned NOE distances per model                    | 80          | 68            |
| RMS of calculated distances to experiment                     | 0.52 Å      | 0.54 Å        |
| Quality NOE distances for the 10 best structures <sup>1</sup> | 3.7         | 3.28          |

<sup>1</sup>The quality is calculated according to  $Q = n/\chi^2$  with:  $\chi^2 = \sum_i^n \left( \frac{Exp_i - Calc_i}{Error_i} \right)^2$
